1  
2  
3  
4  
5  
6  
7  
8  
9  
10  
11  
12  
13  
14  
15  
16  
17  
18  
19  
20  
21  
22  
23  
24  
25  
26  
27  
28  
29  
30  
31  
32  
33  
34  
35  
36  
37

**Main Manuscript for**  
The multidimensional nutritional niche of fungus-cultivar provisioning  
in free-ranging colonies of a neotropical leafcutter ant

Antonin J.J. Crumière<sup>1\*</sup>, Aidan James<sup>1†</sup>, Pol Lannes<sup>1†</sup>, Sophie Mallett<sup>1</sup>, Anders Michelsen<sup>2</sup>, Riikka Rinnan<sup>2</sup> and Jonathan Z. Shik<sup>1,3</sup>

<sup>1</sup>: Section for Ecology and Evolution, Department of Biology, University of Copenhagen, Universitetsparken 15, 2100 Copenhagen, Denmark

<sup>2</sup>: Department of Biology, University of Copenhagen, Universitetsparken 15, 2100 Copenhagen, Denmark

<sup>3</sup>: Smithsonian Tropical Research Institute, Apartado Postal 0843-03092, Balboa, Ancon, Panama

†These authors contributed equally to this work.

\*correspondence: [antonin.crumiere@gmail.com](mailto:antonin.crumiere@gmail.com)

ORCIDs: Antonin J.J. Crumière (0000-0003-2214-2993), Anders Michelsen (0000-0002-9541-8658), Riikka Rinnan (0000-0001-7222-700X), Jonathan Z. Shik (0000-0003-3309-7737)

**Classification**

Biological sciences, Ecology

**Keywords**

Nutritional geometry, fundamental and realized niches, fungus, herbivory, leafcutter ants

**Author Contributions**

A.J.J.C and J.Z.S designed the study and experiments. A.J.J.C, S.M., A.J., P.L., A.M. and R.R. performed experiments and collected samples and data. A.J.J.C analyzed the data. A.J.J.C and J.Z.S interpreted the data and wrote the original draft.

**This PDF file includes:**

Main Text

Figures 1 to 5

38 **Abstract**

39 The foraging trails of *Atta* leafcutter colonies are among the most iconic scenes in  
40 Neotropical ecosystems, with thousands of ants carrying freshly cut plant fragments back to their  
41 nests where they are used to provision a fungal food crop. We tested a hypothesis that the fungal  
42 cultivar's multidimensional requirements for macronutrients (protein and carbohydrates) and  
43 minerals (Al, Ca, Cu, Fe, K, Mg, Mn, Na, P and Zn) govern the foraging breadth of *Atta colombica*  
44 leafcutter ants in a Panamanian rainforest. Analyses of freshly cut plant fragments carried by  
45 leafcutter foragers showed that the combination of fruits, flowers, and leaves provide for a broad  
46 realized nutritional niche that can maximize cultivar's performance. And, while the leaves that  
47 comprised the most harvested resource also delivered an intake target containing protein in excess  
48 of the amounts that can maximize cultivar growth, *in vitro* experiments showed that the minerals P,  
49 Al, and Fe can enhance the cultivar's tolerance to protein-biased substrates, and potentially expand  
50 the ants' foraging niche. Yet, the cultivar also exhibits narrow margins between mineral limitation  
51 and toxicity that may render plant fragments with seemingly optimal blends of macronutrients  
52 unsuitable for provisioning. Our approach highlights that optimal foraging is inherently  
53 multidimensional and links the foraging behavior of a generalist insect herbivore to the fundamental  
54 nutritional niche of its microbial symbiont.

55

56 **Significance Statement**

57 Colonies of *Atta colombica* leafcutter ants can contain millions of specialized workers  
58 exhibiting large-scale generalist herbivory. Yet, this generalist foraging niche also depends on the  
59 poorly understood physiological needs of the ants' domesticated fungal cultivar. We show the  
60 cultivar's fundamental nutritional niche is broad for carbohydrates but narrower for protein and a  
61 suite of minerals, but that the cultivar's sensitivity to excess protein is also mediated by Al, Fe, and  
62 P. More generally, this study decouples the multidimensional foraging strategies that enable a  
63 generalist herbivore to navigate a complex nutritional landscape and mix many imbalanced foods  
64 to achieve balanced cultivar provisioning.

65 **Main Text**

66

67 **Introduction**

68

69 Natural selection is predicted to favor traits that enable consumers to acquire nutritionally  
70 balanced diets (1, 2). For insect herbivores, such nutrient regulation often poses major challenges.  
71 First, plant foods tend to contain carbon (C) in far higher concentrations than other limiting  
72 resources like nitrogen (N) and phosphorus (P) (3). Second, each mouthful of ingested plant tissue  
73 is likely to contain valuable macronutrients (e.g. carbohydrates, proteins, lipids) and other essential  
74 components (e.g. vitamins, minerals), but also a mix of recalcitrant compounds (e.g. cellulose) and  
75 toxins (e.g. tannins) (4). Third, insects are seldom limited by a single nutrient at a time, and the  
76 value of a given plant resource thus depends on the ratios and concentrations of multiple interacting  
77 nutrients (5). The field of nutritional geometry has provided new approaches for studying these  
78 multidimensional dietary challenges (6-8) and has shown that organisms have diverse strategies  
79 for prioritizing specific nutrients when foraging for and consuming imbalanced foods (9-11). We  
80 extended nutritional geometry approaches to study nutritional regulation strategies in free-ranging  
81 colonies of the leafcutter ant *Atta colombica*. These ants are ecologically important neotropical  
82 herbivores and belong to a lineage that is unique among ants in collecting food resources (*i.e.* plant  
83 fragments) to provision a domesticated fungal food crop (*Leucoagaricus gongylophorus*) rather  
84 than ant nestmates (12).

84

85 Nutritional geometry studies have usually focused on covarying macronutrients ((13-15),  
86 *but see* (16)), even though over 25 mineral elements are essential for life (17, 18). For instance,  
87 leafcutter ants concentrate Mg and Ca in their cuticle as a protective armor (19) and Zn as a  
88 hardening agent in their mandibles (20), while also preferentially foraging for Na-rich substrates  
89 (21) and avoiding vegetation with elevated Mn and Al (22). Plant foods are typically assumed to  
90 contain minerals in sufficient abundance to meet the low requirements of insect herbivores (4), but  
91 mineral concentrations also vary widely across plant species and tissues within individual plants  
92 (23-25). Minerals also tend to exhibit thresholds beyond which limitation becomes toxicity (26, 27),  
93 and minerals like Na, Al, Fe, Cu, and Zn can even be sequestered by plants to deter herbivores as  
94 quantitative chemical defenses (28-31). We thus hypothesized that minerals in vegetation can  
95 inhibit farming performance when leafcutter ants provision them in excess of their fungal cultivar's  
96 tolerances and requirements.

96

97  
98 Leafcutter ants have multiple opportunities for such nutritional regulation. First, each type  
99 of plant substrate has a specific nutritional profile (Figure 1A), and colonies can target nutritional  
100 blends by foraging among leaves, fruits, flowers (32, 33) and across plant species (Figure 1B) (34).  
101 Indeed, a single *A. colombica* colony can forage up to 126 plant species (53 families) and up to  
102 370 kg (dry mass) of plant substrates during an annual cycle (35). These ants are thus extreme  
103 generalist foragers compared to the majority of insect herbivores that consume a few (ca. 3) plant  
104 families (36). The next phase occurs when gardener ants within underground fungus cultivation  
105 chambers macerate vegetation fragments and add a mixture of enzyme-rich fecal droplets to  
106 promote fungal hyphal growth and production of nutrient-rich hyphal tips called gongylidia  
107 (packaged in bundles called staphylae) (Figure 1C) (37, 38). Given the potential fungicultural  
108 benefits of optimized nutrient provisioning, we conjecture that colonies forage across plant  
109 substrates (Figure 1D) to acquire a realized nutritional niche (RNN) that targets cultivar  
110 fundamental nutritional niches (FNN) for maximal crop yield (Figure 1E) (34, 39).

110

111  
112 Recent lab-based experiments with nutritionally-defined diets have shown that: 1) *A.*  
113 *colombica* colonies tightly regulate protein foraging at low levels while allowing carbohydrate intake  
114 to fluctuate, and 2) the fungal cultivar is more sensitive to fluctuations in protein than carbohydrates,  
115 with reduced growth and survival when protein concentrations in available substrates exceed ca.  
116 20% total dry mass (34). However, studies of free-ranging leafcutters have shown that some  
117 colonies preferentially forage N-rich leaves and thus likely target proteins built from N-rich amino  
118 acids (22, 40-42). This mixed evidence of protein regulation is likely due to the chemical complexity  
119 of field-collected vegetation relative to the controlled protein:carbohydrate diets used to assess the  
120 cultivar's nutritional needs in the lab. Specifically, the minerals that likely vary across vegetation

121 fragments, but which remain at low levels in lab diets, can influence the metabolic activity of fungi  
122 and their ability to access other nutrients in foods (43-47).  
123

124 In the present study, we sought to explain how *A. colombica* leafcutter ants navigate a  
125 lowland Panamanian rainforest landscape of taxonomically and chemically diverse plant  
126 substrates, and whether the multidimensional foraging strategies of ant workers are mediated by  
127 the FNNs of their fungal cultivar *L. gongylophorus*. To do this, we first determined the cultivar's  
128 FNN dimensions across interacting gradients of two macronutrients (protein, carbohydrates) and  
129 10 minerals (Al, Ca, Cu, Fe, K, Mg, Mn, Na, P and Zn). We next quantified RNNs by identifying and  
130 nutritionally analyzing the vegetation fragments sampled from the mandibles of laden *A. colombica*  
131 foragers in the field. By overlaying RNNs atop of cultivar's FNNs, we sought to determine the  
132 decisive nutrients and minerals regulated by leafcutter ants when provisioning their cultivars.  
133

## 134 Results

### 135 136 Minerals shape the cultivar's macronutrient requirements

137 To assess the effects of minerals on the cultivar performance, we first established a  
138 performance baseline by quantifying the cultivar's FNNs for hyphal growth and staphyla density  
139 across an *in vitro* gradient of protein and carbohydrate (Pr:C) availability. This echoed recent  
140 findings (34), but also included lower nutritional concentrations to visualize the cultivar's FNN  
141 across a broader range of plant substrates. Maximal hyphal growth occurred across a broad  
142 carbohydrate gradient up to 60% of macronutrient dry mass and with carbohydrate-biased Pr:C  
143 ratios ranging from 1:9 to 1:1 Pr:C (i.e. the red area in Figure 2A, Figure S1A, Tables S1-S2).  
144 Staphyla density was maximized across a narrower range of carbohydrates (up to 40%) but a wider  
145 range of protein (up to 30%). Staphyla density also had two distinct FNN peaks, with one in a  
146 carbohydrate-biased region below 1:3 Pr:C and another in a protein-biased region below 6:1 Pr:C  
147 (Figure 2B, Figure S1B-C, Tables S1-S2). These results indicate that both fungal traits are more  
148 sensitive to fluctuations in protein than carbohydrates, and that colonies have opportunities to use  
149 targeted doses of protein to selectively promote staphyla production.  
150

151 We next examined the effects of minerals on cultivar growth relative to the baseline effects  
152 of macronutrients described above. We selected mineral addition treatments following extensive  
153 pilot experiments (Figure S2) and focused on hyphal growth as staphylae were often absent from  
154 mineral addition plates. Three minerals (Al, Fe, P) increased cultivar growth in the previously toxic  
155 protein-rich media, and P in particular was associated with up to 150% higher growth rates on the  
156 most protein-biased diets (Figure 3, Tables S3-S5). Other minerals either caused general toxicity  
157 effects by narrowing the cultivar's FNN dimensions (Mn, Cu, K) or reducing cultivar growth across  
158 all protein and carbohydrate combinations (Ca, Mg, Na, and Zn) (Figure S3, Tables S3-S5).  
159 Fluctuations in mineral concentrations can thus reduce the cultivar's growth performance and  
160 potentially render plant fragments with seemingly optimal blends of macronutrients unsuitable for  
161 cultivar provisioning.  
162

### 163 The macronutrient RNN targeted by free-ranging leafcutter ants

164 We next explored whether and how the cultivar's FNN governs nutrient regulation  
165 strategies of foraging leafcutters in the field. We used Near Infrared Spectroscopy (48) to  
166 nutritionally analyze plant fragments carried by returning laden foragers from six *A. colombica*  
167 colonies (Table S6). We first quantified RNN dimensions in terms of protein and carbohydrates,  
168 based on collections of 44,533 plant fragments (dry mass 220.38 g) from 44 plant species  
169 (identified by DNA barcoding of ~276 bp of *ITS1*; Figure 4A, Table S7) during 54 collection hours.  
170 Colonies foraged 2166 ( $\pm$  283 SD) total fragments per 30-min, indicating that we collected ca. 40%  
171 ( $\pm$  9% SD) of available fragments during each collection period (Figure S4). Colonies exploited  
172 similar numbers of plant species (Figure S5), although most plant species were foraged at low  
173 levels (Figure 4A, Figure S6, Table S8) and no plant species were common to all six colonies  
174 (Figure S5). Macronutrient concentrations in these substrates ranged from 5 to 42% carbohydrates  
175 and 5 to 35% protein (Figure 4B), yielding a broad RNN that overlapped with the cultivar's FNNs

176 for maximal hyphal growth (Figure 4C) and staphyla density (Figure 4D). Yet this RNN also  
177 exceeded protein levels that can reduce cultivar growth performance.  
178

179 Colonies could target different RNN dimensions by collecting leaves (96.2% dry mass),  
180 flowers (2.9%), and fruit pieces (0.9%) (Figure 4A, Figure S6) as each substrate type had distinct  
181 blends of nutrients. First, while fruits and flowers had carbohydrate-biased RNNs, their RNNs did  
182 not overlap as fruits had higher carbohydrate concentrations (> 25%) than flowers (< 25%) (Figure  
183 4B-C). Second, the leaf RNN spanned broader total macronutrient concentrations (5% to 50%) and  
184 tended to have more protein than flowers or fruits (Figure 4B-C). Leaves were also the dominant  
185 substrate type and thus governed each colony's overall intake target, defined as the nutritional  
186 blend selected by a colony that in principle maximizes the cultivar's performance, and against which  
187 surplus or deficient intake can be inferred (4, 5, 8). As a result, the intake target selected by ant  
188 foragers was biased towards protein levels that were beyond the cultivar's FNN for maximal hyphal  
189 growth (Figure 4C, Figure S7), but near the protein-biased RNN for maximal staphyla density  
190 (Figure 4D, Figure S8).  
191

### 192 Optimal foraging requires multidimensional nutritional regulation

193 We next examined whether and how colonies regulate foraging of ten minerals to which  
194 the cultivar has narrow margins between limitation and toxicity. Mineral profiles varied widely across  
195 the 52 foraged plant substrates (Figure 5A, Table S8) and across leafcutter colonies (Figure S9,  
196 Table S9). Despite this variation, the more toxic minerals tended to occur at lower concentrations  
197 in foraged plant fragments (Figure 5B). Specifically, the most toxic minerals (Cu, Mn, Zn) that  
198 reduced cultivar growth at the lowest concentrations (60 mg/L) were measured in micrograms per  
199 gram of plant tissue ( $\mu\text{g/g}$ ), while the least toxic minerals (Ca, K, Mg, Na) that the cultivar tolerated  
200 at higher concentrations (>600 mg/L) occurred in levels up to milligrams per gram (mg/g) of plant  
201 tissue (Figure 5B, Figure S2). The trace metals critical to an array of metabolic processes (Cu, Mn,  
202 Zn) thus appear to be generally foraged at lower levels than the ions that flux across cell  
203 membranes (Ca, K, Mg, Na). Despite these effects of individual minerals, the results thus far also  
204 show that mineral effects on cultivar performance are mediated by blends of macronutrients. We  
205 explore these nutritional interactions below.  
206

207 Solitary insect herbivores are known to tolerate more toxins when their diets also contain  
208 optimal blends of macronutrients that are close to the insects' self-selected intake targets (49, 50).  
209 We extended this hypothesis to leafcutter ants and found that concentrations of the most toxic  
210 minerals (Cu, Mn, Zn) in foraged vegetation tended to peak closer to the macronutrient intake target  
211 compared to the less toxic minerals (Ca, K, Mg, Na) that peaked in carbohydrate-biased or protein-  
212 biased substrates (Figure 5C). This suggest that the negative effects of mineral surplus can be  
213 mitigated when the cultivar receives optimal blends of macronutrients. We next examined Al, Fe,  
214 and P that enhanced the cultivar's protein tolerance, and hypothesized these minerals can expand  
215 a colony's foraging niche across protein-biased plant substrates (Figure 3). We focused on the  
216 mineral RNNs for leaves, as fruits and flowers were never protein-biased and contributed little to  
217 total mineral provisioning due to their low biomass. As predicted, the most protein-rich leaves also  
218 contained the highest Fe and P concentrations (Figure 5C). The concentration of Al in leaves was  
219 not sufficient to assess this hypothesis as its RNN peak was due to a single fruit (Figure 5C). These  
220 results highlight that successful farming systems require multidimensional nutrient regulation and  
221 suggest a wealth of unexplored reciprocal adaptations in ants and fungal cultivars for optimizing  
222 this controlled provisioning.  
223  
224  
225  
226

## 227 Discussion

228 The ecological success of leafcutter ants hinges upon nutritionally optimized fungus cultivar  
229 provisioning. We tested the hypothesis that ants regulate nutritional intake by foraging across plant  
230 species and substrate types to collect a realized nutritional niche (RNN) whose dimensions overlap  
231 with their cultivar's fundamental nutritional niche (FNN) (Figure 1). We show that foraging must be  
232 optimized in N nutritional dimensions. First, a plant fragment can contain carbohydrate  
233 concentrations that maximize cultivar growth, and still be unsuitable for cultivar provisioning if its  
234 protein concentration exceeds ca. 20% (Figure 2). Second, this same protein-rich plant fragment  
235 may actually be suitable if it contains a narrow range of Al, Fe, or P that enhances the cultivar's  
236 protein tolerance (Figure 3). We further show that colonies have opportunities to regulate their RNN  
237 dimensions by foraging across carbohydrate-biased fruits and flowers and protein-biased leaves  
238 (Figure 4). Yet, the cultivar's narrow tolerance for fluctuating mineral provisioning also raises  
239 questions about the extreme generalist herbivory of leafcutter colonies that collect plant fragments  
240 with widely varying mineral profiles (Figure 5). More generally, the approach developed in this study  
241 provides a means to explain how the physiology of a microbial symbiont shapes to the  
242 multidimensional niche breadth of its insect host.

243  
244 Like solitary generalist herbivores, leafcutter ants have the advantage of mixing many  
245 imbalanced foods to achieve balanced nutrition while also avoiding toxins (4, 51, 52). Unlike solitary  
246 herbivores, leafcutter colonies can recruit thousands of ants to sample many chemically diverse  
247 plant species at once (53). This distributed foraging facilitates dynamic nutritional regulation, but  
248 also poses unique challenges. Gardener ants in the nest must detect feedback from their fungal  
249 cultivar about its nutritional needs (54) and then communicate this information to foragers (55) and  
250 to other workers that dispose of large numbers of suboptimal fragments directly into enormous  
251 trash heaps (12, 56, 57). These sequential stages are analogous to pre-ingestive nutritional  
252 regulation of solitary herbivores (e.g. foragers select among imbalanced available plants) and post-  
253 ingestive regulation (e.g. gardeners expel nutritionally suboptimal fragments from the nest)(4). The  
254 critical regulatory decision points thus likely depend less on any decisive nutrient or nutrient-  
255 targeting enzyme (e.g. a pectinase) (58), but rather on the decisive cues (e.g. volatile  
256 semiochemicals (54, 59)) that enable ants to detect the cultivar's immediate nutritional needs and  
257 then adjust provisioning.

258  
259 Leafcutter ants also face different nutritional challenges than solitary herbivores. First,  
260 whereas most herbivores are protein limited (60), leafcutter ants tightly regulate protein intake if  
261 given the opportunity because excess protein can cause crop failure (34). Second, regulation of  
262 trace minerals is not typically assumed in insect herbivores (4), but fungal cultivars may experience  
263 minerals like plant quantitative plant defenses. Leafcutter colonies thus appear to forage the  
264 minerals with the highest potential for toxicity (Cu, Mn, Zn) at the lowest levels, and accept elevated  
265 concentrations only in leaves that are also optimized for macronutrient content. Minerals like Al,  
266 Fe, and P may further govern the leafcutter foraging niche, enhancing access to the most protein-  
267 biased leaves, perhaps by chemically immobilizing excess protein (61) or altering the cultivar's  
268 metabolic processing capacity (46, 62, 63). In particular, the tight link between N and P content  
269 seen across plant species (64) suggests that the effects of P on the cultivar's protein tolerance  
270 have been reinforced over millions of years of co-evolutionary crop domestication in *A. colombica*  
271 and other species of *Atta* that are also known to forage for N-rich leaves (*A. cephalotes* (22) and  
272 *A. laevigata* (41)).

273  
274 Adaptative responses to mineral-macronutrient interactions would add to the impressive  
275 list of nutritional adaptations in the *L. gongylophorus* fungus, including expression of digestive  
276 enzymes that detoxify fresh vegetation (65) and degrade its carbohydrates (e.g. pectin) (66, 67).  
277 The cultivar's physiological adaptations function seamlessly with the work of mobile gardener ants  
278 that ingest fungal gongyliidia and then produce fecal droplets that distribute N-rich compounds (e.g.  
279 allantoin, ammonia, all 21 amino acids, (68)) and enzymes to begin digesting plant substrates on  
280 the growing fungus garden (38, 69). The nutritional contributions of bacteria within the farming  
281 symbiosis are also increasingly coming into focus, as they fix nitrogen (70), metabolize lipids (e.g.  
282 lipids, (71)), and can detoxify plant secondary metabolites (72). Within individual leafcutter ants,

283 bacteria can also fix nitrogen (70) and metabolize citrate (33). Yet, leafcutter ants are the crown  
284 group of a monophyletic clade of over 250 fungus-farming ant species that scavenge mostly insect  
285 frass, tiny decaying wood pieces, flower bits, and occasionally mineral-rich insect cuticles for  
286 cultivar provisioning (32-34). The approach developed in the present study provides a means of  
287 linking the physiological traits of these diverse cultivars with the specific multidimensional nutritional  
288 challenges faced by foraging workers in complex foraging environments.

## 289 **Materials and Methods**

290

### 291 Fungal isolation and *in vitro* growth experiment

292 We isolated *L. gongylophorus* fungus gardens of two lab *A. colombica* colonies (ID: AC-  
293 2012-1 and AC-2014-2) collected in Soberanía Park (Panama) and maintained at the University of  
294 Copenhagen, in Denmark. We isolated fungus from the middle layer of the gardens and viewed the  
295 samples under a dissecting microscope. We then used a sterile dissecting needle to transfer  
296 staphyla to 60-mm petri dishes containing autoclaved potato dextrose agar media (PDA). Petri  
297 dishes were sealed with parafilm and incubated at 23.5 °C for a week in the dark. Clean fungal  
298 cultures were then transferred to new Petri dishes with PDA, sealed and incubated again for two  
299 weeks. We then isolated from these plates, repeating the transfer procedure, and letting these  
300 cultures grow for three weeks.

301 We used these isolates to estimate the growth rate of *L. gongylophorus* in a no-choice  
302 experiment with seven protein:carbohydrate diets (9:1, 6:1, 3:1, 1:1, 1:3, 1:6, 1:9 Pr:C) arrayed  
303 across three protein + carbohydrates concentrations (4, 8 or 25 g/L) (Table S10; adapted from (39)).  
304 We added protein using equal amounts of bactopectone (BD), bactotryptone (BD), and trypticase  
305 peptone (BD), carbohydrates using equal amounts of sucrose (Mamone) and starch (Sigma-  
306 Aldrich), bacteriological agar (VWR), and double-distilled water. Media were autoclaved at 121 °C  
307 and then 10 mL of were plated per sterile 60-mm petri dish under laminar flow. Plates were then  
308 exposed to UV light for 30 minutes. Fungus from PDA cultures was aseptically inoculated on each  
309 plate (n = 5 plates / diet) using a flame sterilized 4-mm diameter steel cylinder. We then sealed and  
310 stored all plates at 23.5 °C in the dark for 56 days during which we regularly checked plates and  
311 excised any contaminations. If plates were assessed to be heavily contaminated, we removed them  
312 from the experiment and inoculated new replicates. We outlined the outer edge of fungal expansion  
313 on each plate weekly.

314 We next assessed how ten minerals impact fungal performance, by adding the following  
315 compounds to the previously described media in solution: Ca (calcium chloride (CaCl<sub>2</sub>), Sigma-  
316 Aldrich), Na (sodium chloride (NaCl), Merck), K (potassium chloride (KCl), Sigma), Mg (magnesium  
317 sulfate (MgSO<sub>4</sub>), VWR), Zn (zinc sulfate heptahydrate (ZnSO<sub>4</sub>·7H<sub>2</sub>O), Sigma-Aldrich), Fe (iron  
318 sulfate heptahydrate (FeSO<sub>4</sub>·7H<sub>2</sub>O), Sigma), Cu (copper sulfate pentahydrate (CuSO<sub>4</sub>·5H<sub>2</sub>O),  
319 Sigma), Al (aluminum sulfate hydrate (Al<sub>2</sub>(SO<sub>4</sub>)<sub>3</sub>·H<sub>2</sub>O), Alfa Aesar), Mn (manganese chloride  
320 tetrahydrate (MnCl<sub>2</sub>·4H<sub>2</sub>O), Sigma-Aldrich), and P (85% phosphoric acid (85% H<sub>3</sub>PO<sub>4</sub>), Alfa Aesar)  
321 (Table S10). For some media (Al, Cu, Fe, P and Zn), the addition of minerals before sterilization  
322 resulted in permanent liquid diets after autoclaving. We thus added minerals to these diets after  
323 they were autoclaved to ensure solidification.

324 We initially performed a pilot study to identify experimentally relevant concentration ranges  
325 for each mineral. To do this, we inoculated and incubated plates as described above and observed  
326 them over 70 days. We used diet treatments including all seven Pr:C ratios at 8 g/L Pr+C  
327 concentration. We used eight concentrations for each mineral (n = 3 replicates per condition + 3  
328 baseline plates with no mineral per condition; n = 1,890 plates). We chose three representative  
329 concentrations for each mineral: baseline (no mineral added), highest growth, and the highest  
330 concentration enabling growth. We then expanded the experiment to macronutrient concentrations  
331 of 4 and 25 g/L for the seven Pr:C ratios for the three concentrations for each mineral (Figure S10),  
332 replicating each mineral concentration 3 times with 3 baseline plates with no mineral (n = 1,260  
333 plates).

334

### 335 Measuring fungal performance

336 After the defined period of growth, we photographed each plate using a Canon EOS 7D  
337 Mark II camera mounted on a fix stand. We used ImageJ (v1.52a; (73)) to estimate fungal

338 expansion (area, mm<sup>2</sup>) based on the final circumference line drawn around the outer border of the  
339 fungus using threshold contrast-adjusted greyscale images (with pixel<sup>2</sup> = 0.02). We counted  
340 staphylae directly from plates viewed under a dissecting microscope for the no-choice diet  
341 experiment plates with no minerals. We used pheatmap package (v1.0.2.12; (74)) in RStudio v3.6.2  
342 (75) to plot hyphal growth across the seven Pr:C ratios and 16 mineral concentrations for the 8 g/L  
343 Pr+C dilution. We used fields package (v10.3; (76)) in RStudio to plot cultivar FNNs for hyphal  
344 growth and staphyla density across nutritional landscapes with topological resolution of response  
345 surface, using  $\lambda = 0.001$  as the smoothing parameter. To facilitate comparison with nutritional data  
346 attained from field-collected substrates (described below), nutritional concentrations in growth  
347 media were converted from g/L to % of total protein and carbohydrate mass relative to the total dry  
348 biomass of the growth media including non-nutritive components like agar.

#### 349 Substrate collections from *A. colombica* colonies

350 We located six colonies of *A. colombica* 287 m to 13.9 km apart in lowland tropical  
351 rainforest habitats at Soberanía National Park, Panama during the wet season (a period of high ant  
352 activity) from May 2 to June 29 2019 (Table S6). Vouchers of *A. colombica* ants were deposited in  
353 the Museo de Invertebrados Fairchild, Universidad de Panama. We then laid on trash bags next to  
354 each colony's main nest entrance next to the most active foraging trail and collected plant  
355 substrates from laden returning foragers. Each collection event lasted 1.5 hours (between 9:00 and  
356 12:00 AM) and was repeated by two observers on three days per colony for a total of 9 collection  
357 hours per colony. Each collection event included three 30-minute sampling periods, after which all  
358 collected substrates were placed into Ziploc bags and stored in a cooler. Total foraging levels on  
359 trails were then estimated by counting laden returning foragers during three observation periods of  
360 10 minutes (using a manual counter) between each 30-minute sampling periods. These data  
361 showed that our substrate sampling capacity ranged from 39 to 50% of each colony's total foraging  
362 effort (Figure S4). Back at the lab, we used a dissecting stereoscope to separate and weigh  
363 substrates based on morphospecies identifications. Substrates were further separated per colony  
364 and collection day, and then freeze-dried with a SP Scientific BenchTop Pro with Omnitronics for  
365 24 hours. Samples were then weighed for dry mass and stored at -20°C in Ziploc bags with silica  
366 gel.

#### 367 DNA extraction and identification of plant samples

368 Back in Copenhagen, we homogenized ground freeze-dried plant samples in 10% Chelex  
369 (Sigma) and extracted DNA following 30 minutes of incubation at 100°C. We amplified by PCR the  
370 *Internal Transcribed Spacer 1 (ITS1)* genetic marker using primers containing both the generic M13  
371 sequences (used for subsequent sequencing) and the specific *ITS1*-specific Trac01 sequences  
372 (M13F-Trac01F 5' TGTA AACGACGCCAGTGATATCCRTTGCCGAGAGTC 3' and M13R-  
373 Trac01R 5' CAGGAAACAGCTATGACGAAGGAGAAGTCGTAACAAGG 3'). Sequencing was  
374 performed by Eurofins Genomics. We then performed a Blast-n with the DNA sequences in the  
375 NCBI database and attributed species identification to the best hit (based on E-value and percent  
376 identity). When a given sequence obtained several equally possible results, we restricted our  
377 identification to the genus level. We identified 44 different species from the 87 samples initially  
378 categorized into morphospecies (Table S7).

#### 379 Protein and carbohydrate composition of plant samples

380 We placed freeze-dried plant substrates in centrifuge tubes, plunged them into liquid  
381 nitrogen, and homogenised the samples using a plastic pestle. We used near infrared reflectance  
382 spectroscopy (NIRS) to estimate the concentrations of total nitrogen, and total non-structural  
383 carbohydrates (water soluble carbohydrates + starch) from the 87 substrates. We acquired NIRS  
384 spectra for each sample using an Antaris II FT-NIR Analyzer (Thermo Scientific) from 4.000 to  
385 10.000 cm<sup>-1</sup> (2.500 to 1.000 nm) at a resolution of 16 cm<sup>-1</sup> and 2x gain. We used the standard  
386 default instrument calibration as the reference measurement. Each spectrum acquisition was the  
387 mean of 32 monochromatic scans. We performed three replicate spectrum acquisitions with  
388 repacking and calculated a mean spectrum for each sample. We selected a representative subset  
389 of samples for wet chemical analyses using Principal Component Analysis on centered NIRS  
390 spectra of the 87 initially identified sample types after pre-processing using 1<sup>st</sup> derivative model on  
391  
392  
393



394 SIMCA software (Umetrics). We selected the samples according to their position on PCA axes  
395 (farthest away from the center of the data and within the large cluster of scores; (77)), and  
396 depending on whether we had sufficient biomass to meet the requirements of the chemical  
397 analyses.

398 We used a CN analyser (Eurovector) coupled to an isotope ratio mass spectrometer  
399 (Isoprime) to quantify total N from 3 to 4 mg of ground samples. We then estimated the quantity of  
400 total protein by multiplying total N by 6.25, a standard conversion approach in the literature (78).  
401 We estimated total non-structural carbohydrates (hereafter carbohydrates) by quantifying water-  
402 soluble carbohydrates with a Total Carbohydrate Assay Kit (Sigma-Aldrich) and starch with a Total  
403 Starch Assay Kit (Megazyme) using 25 and 50 mg of homogenized plant material, respectively. We  
404 used peach powder as a positive control and water as a negative control in these analyses. We  
405 used these wet chemical data to build partial least squares regression prediction models of the  
406 percentage of total protein and carbohydrates using the first derivative of the NIRS spectra in  
407 SIMCA software (Umetrics) (79). Prediction models were cross-validated with seven segments and  
408 permutation tests with 500 re-calculations were used to analyze models. Root mean square error  
409 of the estimation (RMSEE) for observations in the workset, root mean square error computed from  
410 the selected cross validation round (RMSECV), and  $R^2$  indicating the relationship between the  
411 measured and predicted samples were used to evaluate model performance ((80); Table S11).

412 We used the barcoding results to combine conspecific samples by calculating mean protein  
413 and carbohydrate values, and used these data to generate protein and carbohydrate RNNs for  
414 each of the six observed colonies (Figure S7-S8) and to generate a composite RNN for this  
415 population of *A. colombica*. We defined RNNs as the region bounded by each general plant  
416 substrate type (leaf, fruit, flower). The RNN from one of the colonies (colony 4) was previously  
417 published in (34) as part of a comparative analysis of fungus-farming ants and is included here in  
418 a different conceptual context and as part of a much-expanded dataset about the foraging ecology  
419 of *A. colombica*.

420 We calculated a macronutrient intake target by translating the substrate collection data into  
421 the actually foraged levels of protein and carbohydrates using arithmetic means weighted relative  
422 to total biomass (81). For each substrate we multiplied its percent protein or percent carbohydrates  
423 by the associated dry biomass ( $M$ ). We then summed these values for each colony-observation  
424 period and divided this by the summed dry biomass of all substrates corresponding to colony-  
425 observation period. We used the following formula illustrated here for protein:

426

$$427 \quad \text{Protein \% IT day 1} = \frac{((\text{Protein \%}_1 * M_1) + (\text{Protein \%}_2 * M_2) + \dots)}{(M_1 + M_2 + \dots)}$$

428

429 We then calculated colony-level intake targets by averaging intake targets across each colony's  
430 three observation periods, and calculated a composite *A. colombica* intake target, by averaging  
431 across the six colony-level intake targets (Table S9).

#### 432 Mineral element composition of plant samples

433 We used a plastic pestle to homogenize freeze-dried plant substrate samples with available  
434 biomass ranging from 2 to 100 mg in centrifuge tubes after they were plunged into liquid nitrogen.  
435 We then weighed this plant material into Teflon microwave digestion tubes ( $n = 3$  technical  
436 replicates per sample) and added 2.5 mL of 70% (v/v) nitric acid and 500  $\mu\text{L}$  of 15%  $\text{H}_2\text{O}_2$  for  
437 samples weighing  $> 20$  mg, or 500  $\mu\text{L}$  of 70% (v/v) nitric acid and 250  $\mu\text{L}$  of 15%  $\text{H}_2\text{O}_2$  for samples  
438 weighing  $< 20$  mg. The tubes were then capped and the samples were digested in a microwave  
439 oven at 242  $^\circ\text{C}$  for 25 min (UltraWAVE single reaction chamber microwave digestion system,  
440 Milestone Inc.; CT Multiwave 3000, software version 1.24, Anton Paar GmbH). The resulting  
441 solutions were transferred to polypropylene vials and diluted with MilliQ water to a final volume of  
442 50 mL for samples weighing  $> 20$  mg or 10 mL for samples weighing  $< 20$  mg. The elemental  
443 composition of these samples was measured for Al, Ca, Cu, Fe, K, Mg, Mn, Na, P and Zn using  
444 inductively coupled plasma optical emission spectrometry (ICP-OES; Agilent 5100, Agilent  
445 Technologies) (82, 83). Apple powder and a MilliQ water negative control were also analyzed as  
446 reference samples. For each substrate sample, we used technical replicates to calculate a mean  
447

448 value for each element. For each substrate type (leaf, fruit, flower) for each substrate species, we  
449 then calculated a mean ( $\pm$  SD) for each of the ten elements. Colony mineral intake targets were  
450 estimated by calculating the mean of the three weighted means (one for each day of collection) as  
451 described in previous paragraph (Figure S9, Table S9). We then mapped substrate mineral  
452 concentrations across gradients of substrate protein and carbohydrate concentrations using the  
453 fields package v10.3 (76) in RStudio with topological resolution of response surface  $\lambda = 0.001$  as  
454 the smoothing parameter.

#### 455 Statistical analysis

456 Statistical analyses were performed in RStudio v1.2.5042 (75). We log-transformed the  
457 response variables when necessary to improve normality. We used least-square regressions to  
458 assess the underlying significance and interactions of both linear and quadratic terms and to  
459 support the interpretation of FNN heatmaps: 1) showing variation in fungus hyphal growth area and  
460 staphylo density across the 21 protein and carbohydrate diet combinations (Tables S1-S2), and 2)  
461 showing hyphal growth area across the 441 protein:carbohydrate:mineral substrate combinations  
462 with a separate model for each mineral (Tables S3-S5). Venn diagrams of foraged plant species  
463 distribution across habitats and colonies were generated using eulerr R package (84). The overall  
464 dataset and supporting R scripts are available as supplementary files.

#### 465 **Acknowledgments**

466  
467 Thomas Hesselhøj Hansen and Lena Asta Byrgesen from the Department of Plant and  
468 Environmental Sciences of the University of Copenhagen performed the ICP-EOS analysis. We  
469 thank Damond Kylo for figure illustrations, Audrey Dussutour for advice with nutritional analyses,  
470 and Jacobus Boomsma for comments on an earlier draft of the manuscript. We thank the  
471 Smithsonian Tropical Research Institute for logistical support during fieldwork. This research was  
472 funded by an European Research Council Starting Grant (ELEVATE: ERC-2017-STG-757810) to  
473 J.Z.S. The Ministerio de Ambiente, Republica de Panama provided permits for field research (SE/A-  
474 24-19) and sample exportation (SEX/A-41-19). The authors have declared no competing interest.

#### 475 **References**

- 476 1. Chapman RF (1998) *The Insects: Structure and Function* (Cambridge University Press).
- 477 2. Stephens DW & Krebs JR (1986) *Foraging Theory* (Princeton University Press).
- 478 3. Sterner RW & Elser JJ (2002) *Ecological Stoichiometry: The Biology of Elements from*  
479 *Molecules to the Biosphere* (Princeton University Press).
- 480 4. Behmer ST (2009) Insect Herbivore Nutrient Regulation. *54*(1):165-187.
- 481 5. Simpson SJ & Raubenheimer D (2012) *The Nature of Nutrition: A Unifying Framework from*  
482 *Animal Adaptation to Human Obesity* (Princeton University Press, Princeton, NJ, USA).
- 483 6. Machovsky-Capuska GE, Senior AM, Simpson SJ, & Raubenheimer D (2016) The  
484 Multidimensional Nutritional Niche. *Trends in Ecology & Evolution* 31(5):355-365.
- 485 7. Raubenheimer D (2011) Toward a quantitative nutritional ecology: the right-angled mixture  
486 triangle. *Ecological Monographs* 81(3):407-427.
- 487 8. Shik JZ & Dussutour A (2020) Nutritional Dimensions of Invasive Success. *Trends in*  
488 *Ecology & Evolution* 35(8):691-703.
- 489 9. Dussutour A, Ma Q, & Sumpter D (2019) Phenotypic variability predicts decision accuracy  
490 in unicellular organisms. *Proceedings of the Royal Society B* 286(1896):20182825.
- 491 10. Rothman JM, Raubenheimer D, & Chapman CA (2011) Nutritional geometry: gorillas  
492 prioritize non-protein energy while consuming surplus protein. *Biology Letters* 7(6):847-  
493 849.
- 494 11. Shik JZ, et al. (2014) Metabolism and the rise of fungus cultivation by ants. *The American*  
495 *Naturalist* 184(3):364-373.
- 496 12. Hölldobler B & Wilson EO (2010) *The Leafcutter Ants: Civilization by Instinct* (W. W. Norton  
497 & Co. Ltd.) p 160.
- 498 13. Dussutour A & Simpson SJ (2009) Communal nutrition in ants. *Current Biology* 19(9):740-  
499 744.

- 504 14. Jensen K, *et al.* (2012) Optimal foraging for specific nutrients in predatory beetles.  
505 *Proceedings of the Royal Society B* 279(1736):2212-2218.
- 506 15. Krabbe BA, *et al.* (2019) Using nutritional geometry to define the fundamental  
507 macronutrient niche of the widespread invasive ant *Monomorium pharaonis*. *PLOS ONE*  
508 14(6):e0218764.
- 509 16. Simpson SJ, Sword GA, Lorch PD, & Couzin ID (2006) Cannibal crickets on a forced march  
510 for protein and salt. *Proceedings of the National Academy of Sciences* 103(11):4152-4156.
- 511 17. Frausto da Silva JJR & Williams RJP (2001) *The Biological Chemistry of the Elements:*  
512 *The Inorganic Chemistry of Life* (Oxford University Press).
- 513 18. Kaspari M & Powers JS (2016) Biogeochemistry and Geographical Ecology: Embracing All  
514 Twenty-Five Elements Required to Build Organisms. *The American Naturalist*  
515 188(S1):S62-S73.
- 516 19. Li H, *et al.* (2020) Biomineral armor in leaf-cutter ants. *Nature Communications* 11(1):5792.
- 517 20. Edwards AJ, Fawke JD, McClements JG, Smith SA, & Wyeth P (1993) Correlation of zinc  
518 distribution and enhanced hardness in the mandibular cuticle of the leaf-cutting ant *Atta*  
519 *saxidens rubropilosa*. *Cell Biology International* 17(7):697-698.
- 520 21. Chavarria Pizarro L, McCreery HF, Lawson SP, Winston ME, & O'Donnell S (2012)  
521 Sodium-specific foraging by leafcutter ant workers (*Atta cephalotes*, Hymenoptera:  
522 Formicidae). *Ecological Entomology* 37(5):435-438.
- 523 22. Berish CW (1986) Leaf-Cutting Ants (*Atta cephalotes*) Select Nitrogen-Rich Forage. *The*  
524 *American Midland Naturalist* 115(2):268-276.
- 525 23. Han WX, Fang JY, Reich PB, Ian Woodward F, & Wang ZH (2011) Biogeography and  
526 variability of eleven mineral elements in plant leaves across gradients of climate, soil and  
527 plant functional type in China. *Ecology Letters* 14(8):788-796.
- 528 24. Joern A, Provin T, & Behmer ST (2012) Not just the usual suspects: Insect herbivore  
529 populations and communities are associated with multiple plant nutrients. *Ecology*  
530 93(5):1002-1015.
- 531 25. Mergedus A, *et al.* (2015) Variation of mineral composition in different parts of taro  
532 (*Colocasia esculenta*) corms. *Food Chemistry* 170:37-46.
- 533 26. Höss S, *et al.* (2010) Variability of sediment-contact tests in freshwater sediments with low-  
534 level anthropogenic contamination – Determination of toxicity thresholds. *Environmental*  
535 *Pollution* 158(9):2999-3010.
- 536 27. Ji J, Long Z, & Lin D (2011) Toxicity of oxide nanoparticles to the green algae *Chlorella* sp.  
537 *Chemical Engineering Journal* 170(2):525-530.
- 538 28. Boyd RS (2007) The defense hypothesis of elemental hyperaccumulation: status,  
539 challenges and new directions. *Plant and Soil* 293(1):153-176.
- 540 29. Jansen S, Broadley MR, Robbrecht E, & Smets E (2002) Aluminum hyperaccumulation in  
541 angiosperms: A review of its phylogenetic significance. *The Botanical Review* 68(2):235-  
542 269.
- 543 30. Kaspari M (2020) The seventh macronutrient: how sodium shortfall ramifies through  
544 populations, food webs and ecosystems. *Ecology Letters* 23(7):1153-1168.
- 545 31. Rodríguez N, Menéndez N, Tornero J, Amils R, & De La Fuente V (2005) Internal iron  
546 biomineralization in *Imperata cylindrica*, a perennial grass: chemical composition,  
547 speciation and plant localization. *New Phytologist* 165(3):781-789.
- 548 32. De Fine Licht HH & Boomsma JJ (2010) Forage collection, substrate preparation, and diet  
549 composition in fungus-growing ants. *Ecological Entomology* 35(3):259-269.
- 550 33. Sapountzis P, Zhukova M, Shik JZ, Schiott M, & Boomsma JJ (2018) Reconstructing the  
551 functions of endosymbiotic Mollicutes in fungus-growing ants. *eLife* 7:e39209.
- 552 34. Shik JZ, *et al.* (2020) Nutritional niches reveal fundamental domestication trade-offs in  
553 fungus-farming ants. *Nature Ecology & Evolution*.
- 554 35. Wirth R, Herz H, Ryel RJ, Beyschlag W, & Hölldobler B (2003) *Herbivory of Leaf-Cutting*  
555 *Ants* (Springer-Verlag Berlin Heidelberg) p 233.
- 556 36. Bernays E & Graham M (1988) On the Evolution of Host Specificity in Phytophagous  
557 Arthropods. *Ecology* 69(4):886-892.
- 558 37. Martin MM, Gieselmann MJ, & Martin JS (1973) Rectal enzymes of attine ants.  $\alpha$ -Amylase  
559 and chitinase. *Journal of Insect Physiology* 19(7):1409-1416.

- 560 38. Schjøtt M, Rogowska-Wrzęsinska A, Roepstorff P, & Boomsma JJ (2010) Leaf-cutting ant  
561 fungi produce cell wall degrading pectinase complexes reminiscent of phytopathogenic  
562 fungi. *BMC Biology* 8(1):156.
- 563 39. Shik JZ, *et al.* (2016) Nutrition mediates the expression of cultivar–farmer conflict in a  
564 fungus-growing ant. *Proceedings of the National Academy of Sciences* 113(36):10121-  
565 10126.
- 566 40. Howard JJ (1988) Leafcutting and Diet Selection: Relative Influence of Leaf Chemistry and  
567 Physical Features. *Ecology* 69(1):250-260.
- 568 41. Mundim FM, Costa AN, & Vasconcelos HL (2009) Leaf nutrient content and host plant  
569 selection by leaf-cutter ants, *Atta laevigata*, in a Neotropical savanna. *Entomologia*  
570 *Experimentalis et Applicata* 130(1):47-54.
- 571 42. Valderrama-Eslava EI, Montoya-Lerma J, & Giraldo C (2009) Enforced herbivory on  
572 *Canavalia ensiformis* and *Tithonia diversifolia* and its effects on leaf-cutting ants, *Atta*  
573 *cephalotes*. *Journal of Applied Entomology* 133(9-10):689-694.
- 574 43. Bücking H (2004) Phosphate absorption and efflux of three ectomycorrhizal fungi as  
575 affected by external phosphate, cation and carbohydrate concentrations. *Mycological*  
576 *Research* 108(6):599-609.
- 577 44. Chai B, Wu Y, Liu P, Liu B, & Gao M (2011) Isolation and phosphate-solubilizing ability of  
578 a fungus, *Penicillium* sp. from soil of an alum mine. *Journal of Basic Microbiology* 51(1):5-  
579 14.
- 580 45. Reddy MS, Babita K, Gay G, & Ramamurthy V (2002) Influence of Aluminum on Mineral  
581 Nutrition of the Ectomycorrhizal Fungi *Pisolithus* sp. and *Cantharellus cibarius*. *Water, Air,*  
582 *and Soil Pollution* 135(1):55-64.
- 583 46. Shah V, *et al.* (2010) Influence of iron and copper nanoparticle powder on the production  
584 of lignocellulose degrading enzymes in the fungus *Trametes versicolor*. *Journal of*  
585 *Hazardous Materials* 178(1):1141-1145.
- 586 47. Zhang J & Elser JJ (2017) Carbon:Nitrogen:Phosphorus Stoichiometry in Fungi: A Meta-  
587 Analysis. *Frontiers in Microbiology* 8(1281).
- 588 48. Foley WJ, *et al.* (1998) Ecological applications of near infrared reflectance spectroscopy –  
589 a tool for rapid, cost-effective prediction of the composition of plant and animal tissues and  
590 aspects of animal performance. *Oecologia* 116(3):293-305.
- 591 49. Nichols-Orians CM (1991) Environmentally Induced Differences in Plant Traits:  
592 Consequences for Susceptibility to a Leaf-Cutter Ant. *Ecology* 72(5):1609-1623.
- 593 50. Simpson SJ & Raubenheimer D (2001) The geometric analysis of nutrient–allelochemical  
594 interactions: a case study using locusts. *Ecology* 82(2):422-439.
- 595 51. Bernays EA, Bright KL, Gonzalez N, & Angel J (1994) Dietary Mixing in a Generalist  
596 Herbivore: Tests of Two Hypotheses. *Ecology* 75(7):1997-2006.
- 597 52. Raubenheimer D & Simpson SJ (2003) Nutrient balancing in grasshoppers: behavioural  
598 and physiological correlates of dietary breadth. *Journal of Experimental Biology*  
599 206(10):1669-1681.
- 600 53. Csata E & Dussutour A (2019) Nutrient regulation in ants (Hymenoptera: Formicidae): a  
601 review. *Myrmecological News* 29:111-124.
- 602 54. Green PWC & Kooij PW (2018) The role of chemical signalling in maintenance of the  
603 fungus garden by leaf-cutting ants. *Chemoecology* 28(3):101-107.
- 604 55. Roces F & Hölldobler B (1995) Vibrational communication between hitchhikers and  
605 foragers in leaf-cutting ants (*Atta cephalotes*). *Behavioral Ecology and Sociobiology*  
606 37(5):297-302.
- 607 56. Hart AG & Ratnieks FLW (2002) Waste management in the leaf-cutting ant *Atta colombica*.  
608 *Behavioral Ecology* 13(2):224-231.
- 609 57. Hudson TM, Turner BL, Herz H, & Robinson JS (2009) Temporal patterns of nutrient  
610 availability around nests of leaf-cutting ants (*Atta colombica*) in secondary moist tropical  
611 forest. *Soil Biology and Biochemistry* 41(6):1088-1093.
- 612 58. Salem H, *et al.* (2020) Symbiont Digestive Range Reflects Host Plant Breadth in  
613 Herbivorous Beetles. *Current Biology* 30(15):2875-2886.e2874.

- 614 59. North RD, Jackson CW, & Howse PE (1999) Communication between the fungus garden  
615 and workers of the leaf-cutting ant, *Atta sexdens rubropilosa*, regarding choice of substrate  
616 for the fungus. *Physiological Entomology* 24(2):127-133.
- 617 60. Elser JJ, *et al.* (2000) Nutritional constraints in terrestrial and freshwater food webs. *Nature*  
618 408(6812):578-580.
- 619 61. Schmitt C, Bovay C, Vuilliomonet AM, Rouvet M, & Bovetto L (2011) Influence of protein  
620 and mineral composition on the formation of whey protein heat-induced microgels. *Food*  
621 *Hydrocolloids* 25(4):558-567.
- 622 62. Choi J, Jung WH, & Kronstad JW (2015) The cAMP/protein kinase A signaling pathway in  
623 pathogenic basidiomycete fungi: Connections with iron homeostasis. *Journal of*  
624 *Microbiology* 53(9):579-587.
- 625 63. Parente AFA, *et al.* (2011) Proteomic Analysis Reveals That Iron Availability Alters the  
626 Metabolic Status of the Pathogenic Fungus *Paracoccidioides brasiliensis*. *PLOS ONE*  
627 6(7):e22810.
- 628 64. Niklas KJ, Owens T, Reich PB, & Cobb ED (2005) Nitrogen/phosphorus leaf stoichiometry  
629 and the scaling of plant growth. *Ecology Letters* 8(6):636-642.
- 630 65. De Fine Licht HH, *et al.* (2013) Laccase detoxification mediates the nutritional alliance  
631 between leaf-cutting ants and fungus-garden symbionts. *Proceedings of the National*  
632 *Academy of Sciences* 110(2):583-587.
- 633 66. De Fine Licht HH, Schiøtt M, Mueller UG, & Boomsma JJ (2010) Evolutionary transitions  
634 in enzyme activity of ant fungus gardens. *Evolution* 64(7):2055-2069.
- 635 67. Kooij PW, Schiøtt M, Boomsma JJ, & De Fine Licht HH (2011) Rapid shifts in *Atta*  
636 *cephalotes* fungus-garden enzyme activity after a change in fungal substrate (Attini,  
637 Formicidae). *Insectes Sociaux* 58(2):145-151.
- 638 68. Martin JS & Martin MM (1970) The presence of protease activity in the rectal fluid of attine  
639 ants. *Journal of Insect Physiology* 16(2):227-232.
- 640 69. Shik JZ, Rytter W, Arnan X, & Michelsen A (2018) Disentangling nutritional pathways  
641 linking leafcutter ants and their co-evolved fungal symbionts using stable isotopes. *Ecology*  
642 99(9):1999-2009.
- 643 70. Sapountzis P, *et al.* (2015) *Acromyrmex* Leaf-Cutting Ants Have Simple Gut Microbiota  
644 with Nitrogen-Fixing Potential. *Applied and Environmental Microbiology* 81(16):5527-5537.
- 645 71. Khadempour L, *et al.* (2020) From plants to ants: Fungal modification of leaf lipids for  
646 nutrition and communication in the leaf-cutter ant fungal garden ecosystem. *bioRxiv*.
- 647 72. Francoeur CB, *et al.* (2020) Bacteria Contribute to Plant Secondary Compound  
648 Degradation in a Generalist Herbivore System. *mBio* 11(5):e02146-02120.
- 649 73. Schneider CA, Rasband WS, & Eliceiri KW (2012) NIH Image to ImageJ: 25 years of image  
650 analysis. *Nature Methods* 9(7):671-675.
- 651 74. Kolde R (2015) pheatmap: Pretty Heatmaps.
- 652 75. Team R (2020) RStudio: Integrated Development for R. RStudio (RStudio, PBC Boston,  
653 MA).
- 654 76. Nychka D, Furrer R, Paige J, & Sain S (2017) fields: Tools for spatial data, R package  
655 version 10.3.
- 656 77. Næs T, Isaksson T, Fearn T, & Davies T (2002) *A user-friendly guide to multivariate*  
657 *calibration and classification* (Chichester).
- 658 78. Felton AM, *et al.* (2009) Nutritional Ecology of *Ateles chamek* in lowland Bolivia: How  
659 Macronutrient Balancing Influences Food Choices. *International Journal of Primatology*  
660 30(5):675-696.
- 661 79. Wold S, Sjöström M, & Eriksson L (2001) PLS-regression: a basic tool of chemometrics.  
662 *Chemometrics and Intelligent Laboratory Systems* 58(2):109-130.
- 663 80. Tigabu M & Felton A (2018) Multivariate calibration of near infrared spectra for predicting  
664 nutrient concentrations of solid moose rumen contents. *Silva Fennica* 52(1).
- 665 81. Chambers PG, Simpson SJ, & Raubenheimer D (1995) Behavioural mechanisms of  
666 nutrient balancing in *Locusta migratoria* nymphs. *Animal Behaviour* 50(6):1513-1523.
- 667 82. Chen A, *et al.* (2020) Towards single-cell ionomics: a novel micro-scaled method for multi-  
668 element analysis of nanogram-sized biological samples. *Plant Methods* 16(1):31.

- 669 83. Głazowska S, *et al.* (2018) The impact of silicon on cell wall composition and enzymatic  
670 saccharification of *Brachypodium distachyon*. *Biotechnology for Biofuels* 11(1):171.  
671 84. Larsson J (2020) eulerr: Area-Proportional Euler and Venn Diagrams with Ellipses, R  
672 package version 6.1.0.  
673

674 **Figures**

675

676 **Figure 1: A niche-based framework for testing the hypothesis that leafcutter ants navigate**  
677 **tropical forests to collect plant substrates that target their fungal cultivar's nutritional**  
678 **needs.** (A) Foragers can select among plant substrates (e.g. leaf, fruit, flower) that have distinct  
679 blends of protein, carbohydrates, and minerals. (B) Colonies can regulate nutritional intake by  
680 foraging across hundreds of plant species to acquire a realized nutritional niche (RNN). (C)  
681 Gardener ants convert foraged plant fragments into a nutritional mulch used to provision their fungal  
682 cultivar. (D) These nutrients promote hyphal growth and the production of edible nutrient-rich  
683 hyphal tips called gongylidia (packaged in bundles called staphylae). (E) We can study the ants'  
684 nutrient provisioning strategy in two steps. We first define the cultivar's fundamental nutritional  
685 niche (FNN) by measuring its performance when isolated onto petri dishes and grown across  
686 nutritional gradients, shown here as the light-green trapezoid ranging across protein:carbohydrate  
687 ratios (1:9 to 9:1 Pr:C) and protein + carbohydrate concentrations (4 diagonal rows of individual  
688 diet treatments (grey dots) with negative slopes ranging from 4 to 25 g/L). The red region indicates  
689 a hypothetical FNN of maximal cultivar performance. We then quantify the realized nutritional niche  
690 (RNN, dark green polygon) from nutrients contained in plant fragments foraged by free-ranging  
691 colonies. We array each plant fragment type based on their percent protein and carbohydrates and  
692 test the prediction that ants maximize cultivar performance by providing an RNN whose dimensions  
693 overlap with the cultivar's FNN. The illustrations are by Damond Kylo.

694

695 **Figure 2: Quantifying the macronutrient FNN of the *L. gongylophorus* fungus cultivated by**  
696 ***A. colombica* leafcutter ants.** A) Hyphal growth and B) staphyla density could both be maximized  
697 when provided carbohydrate-biased media, and both traits declined when protein-biased  
698 provisioning exceeded 30%. Staphyla density exhibited a second FNN peak at elevated protein  
699 concentrations (up to 30%) and relatively lower carbohydrate concentrations (up to 20%).  
700 Nutritional landscapes were generated by isolating *L. gongylophorus* from an *A. colombica* colony  
701 and performing *in vitro* experiments with nutritionally-defined media varying in protein:carbohydrate  
702 ratios (from 1:9 to 9:1 Pr:C) and protein + carbohydrate concentrations (4, 8 and 25 g/L).

703

704 **Figure 3: Quantifying the interacting effects of minerals and macronutrients on fungus**  
705 **cultivar growth.** Three minerals (Al, Fe and P) expanded the FNN towards elevated growth in  
706 protein-rich conditions relative to baseline conditions without these minerals. Here we calculated  
707 relative growth percentage using the difference between cultivar's final growth area in presence of  
708 each mineral relative to the same macronutrient condition without the mineral. The diagonal grey  
709 arrow indicates the gradient of mineral percent relative to protein and carbohydrate percent in diets.  
710 We provide two mineral concentration addition treatments. White isoclines indicate reduced growth  
711 relative to the macronutrient baseline, and black isoclines indicate increased growth. Seven other  
712 tested minerals (Ca, Cu, K, Mg, Mn, Na, Zn) induced varying degrees of toxicity for the cultivar  
713 across the gradient of protein and carbohydrate availability (see Figure S3).

714

715 **Figure 4: The plant substrates foraged by free-ranging leafcutter ants yield RNNs that**  
716 **overlap with their cultivar's FNN requirements.** (A) Colonies of *A. colombica* foraged mostly on  
717 leaves of a few plant species, but also collected leaves, fruits, and flowers from 44 plant species.  
718 (B) Foraged substrates (mean  $\pm$  bidirectional SD) spanned macronutrient concentrations from 3 to  
719 35% protein and from 5 to 42% carbohydrate. (C) The RNN polygon of leaves (n=40 species)  
720 contained protein in excess of the cultivar's FNN for hyphal growth, and the RNNs of flowers (n=5  
721 species) and fruits (n=7 species) both overlapped with the carbohydrate-rich FNN for maximal  
722 hyphal growth. (C) The leaf RNN overlapped with the protein-rich FNN for maximal staphyla  
723 density, and the fruit and flower RNNs overlapped with the carbohydrate-rich FNN for maximal  
724 staphyla density. The overall macronutrient intake target was slightly protein-biased (>1:1 Pr:C)  
725 and governed by leaf nutrients that contributed the majority of the foraged biomass. These results  
726 reflect the composite foraging of six *A. colombica* colonies observed during 54 collection hours.  
727 Results for individual colonies are provided in Figure S7-S8. Substrate illustrations in figure legends  
728 are by Damond Kylo.

729

730 **Figure 5: Testing for interactions between the mineral profiles and the macronutrient RNNs**  
731 **of foraged plant substrates.** (A) Leaf mineral profiles of five foraged plant species illustrate the  
732 variation in concentrations of ten minerals observed across the 44 plant species. The minerals Ca,  
733 K, Mg, and P (blue shaded region of radial plots) are expressed in concentrations of mg/g, and Zn,  
734 Na, Mn, Fe, Cu, and Al are expressed in  $\mu\text{g/g}$  (white region). (B) There is a positive correlation  
735 between the cultivar's maximal *in vitro* tolerance for each mineral and its maximal concentration in  
736 foraged plant fragments. (C) Mineral concentrations in foraged fragments are overlaid across  
737 gradients of protein and carbohydrates and interpreted relative to the RNN and intake target of  
738 these two macronutrients. See Results for at detailed interpretation. Substrate illustrations are by  
739 Damond Kylo.



**A**

**Vegetative substrates have distinct nutritional profiles**

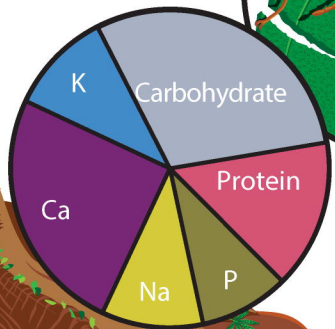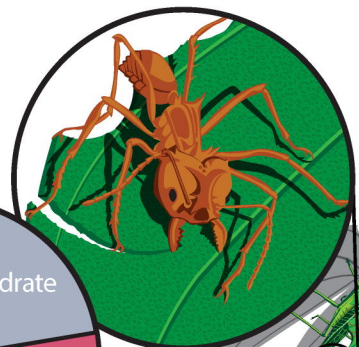

**B**

**Ants navigate nutritional landscapes to collect a realized nutritional niche (RNN)**

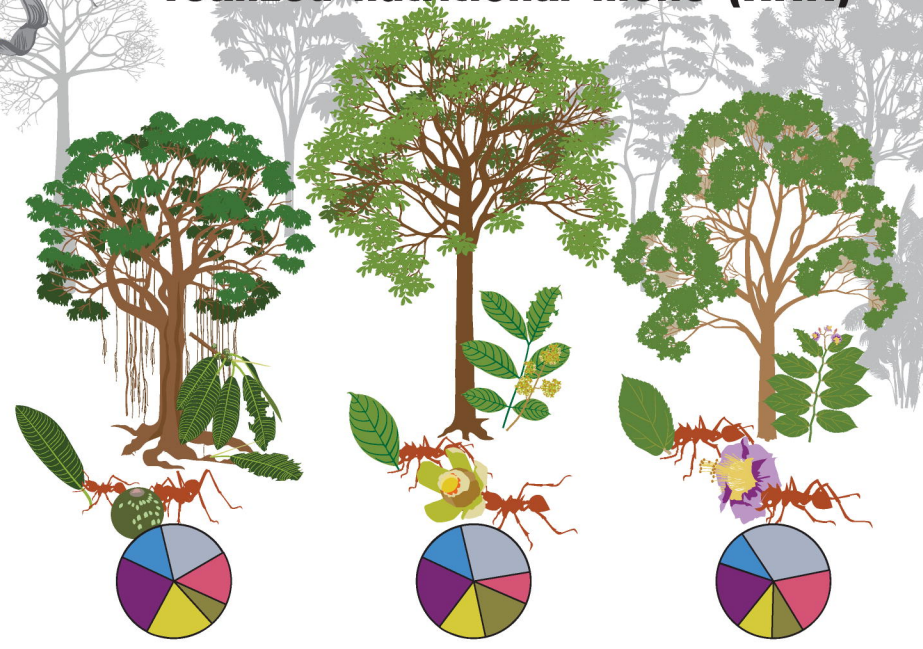

**C**

**Leafcutter ants convert freshly cut vegetation into fungus fertilizer**

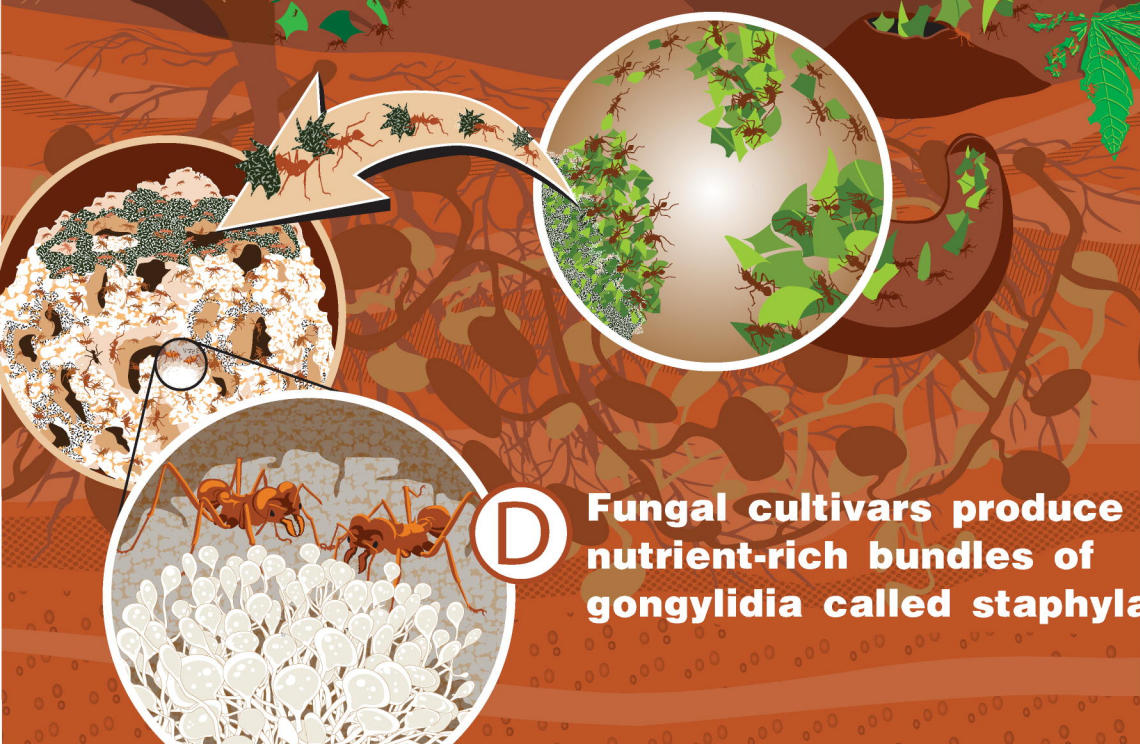

**D**

**Fungal cultivars produce nutrient-rich bundles of gongylidia called staphyla**

**E**

**Prediction: Ants maximize crop yield by collecting RNNs within cultivar FNN requirements**

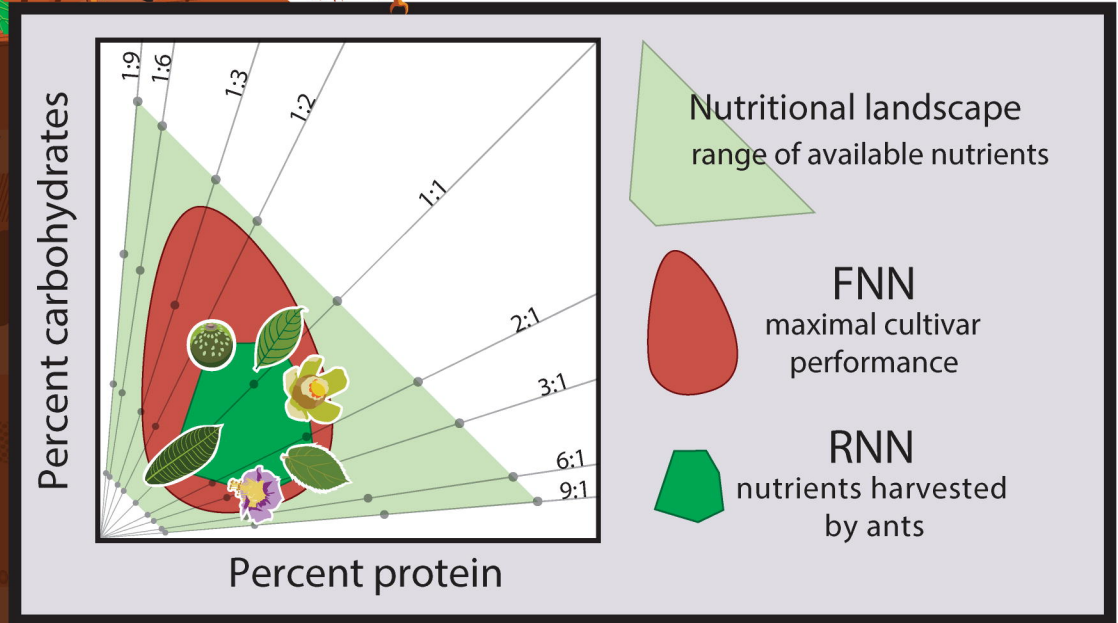

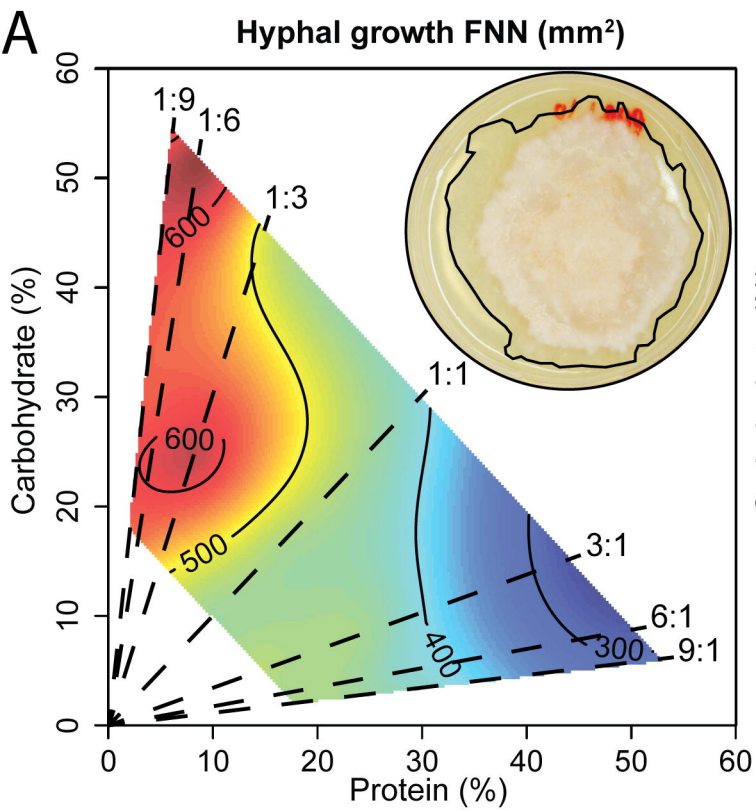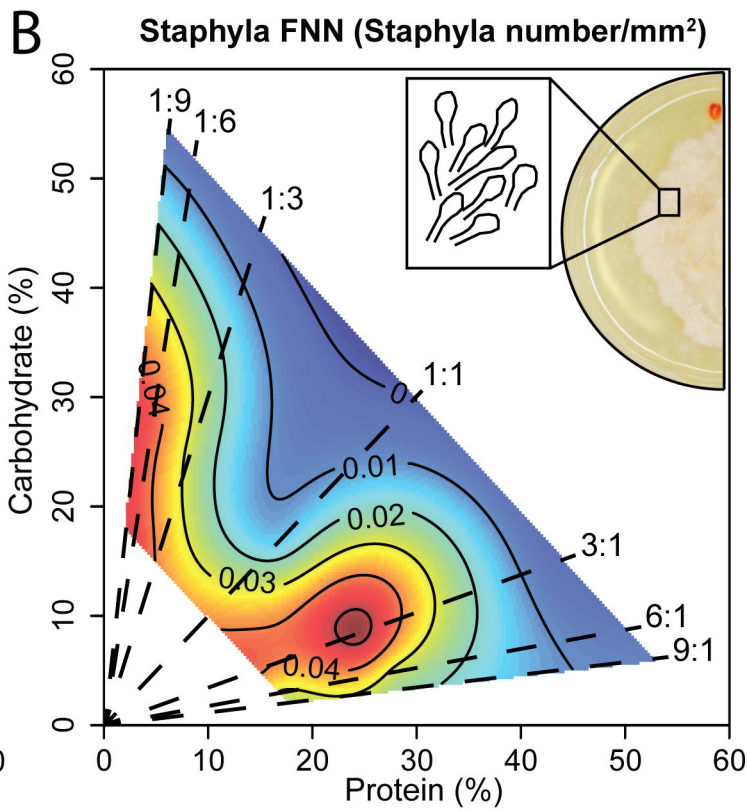

# Hyphal growth FNN in presence of minerals

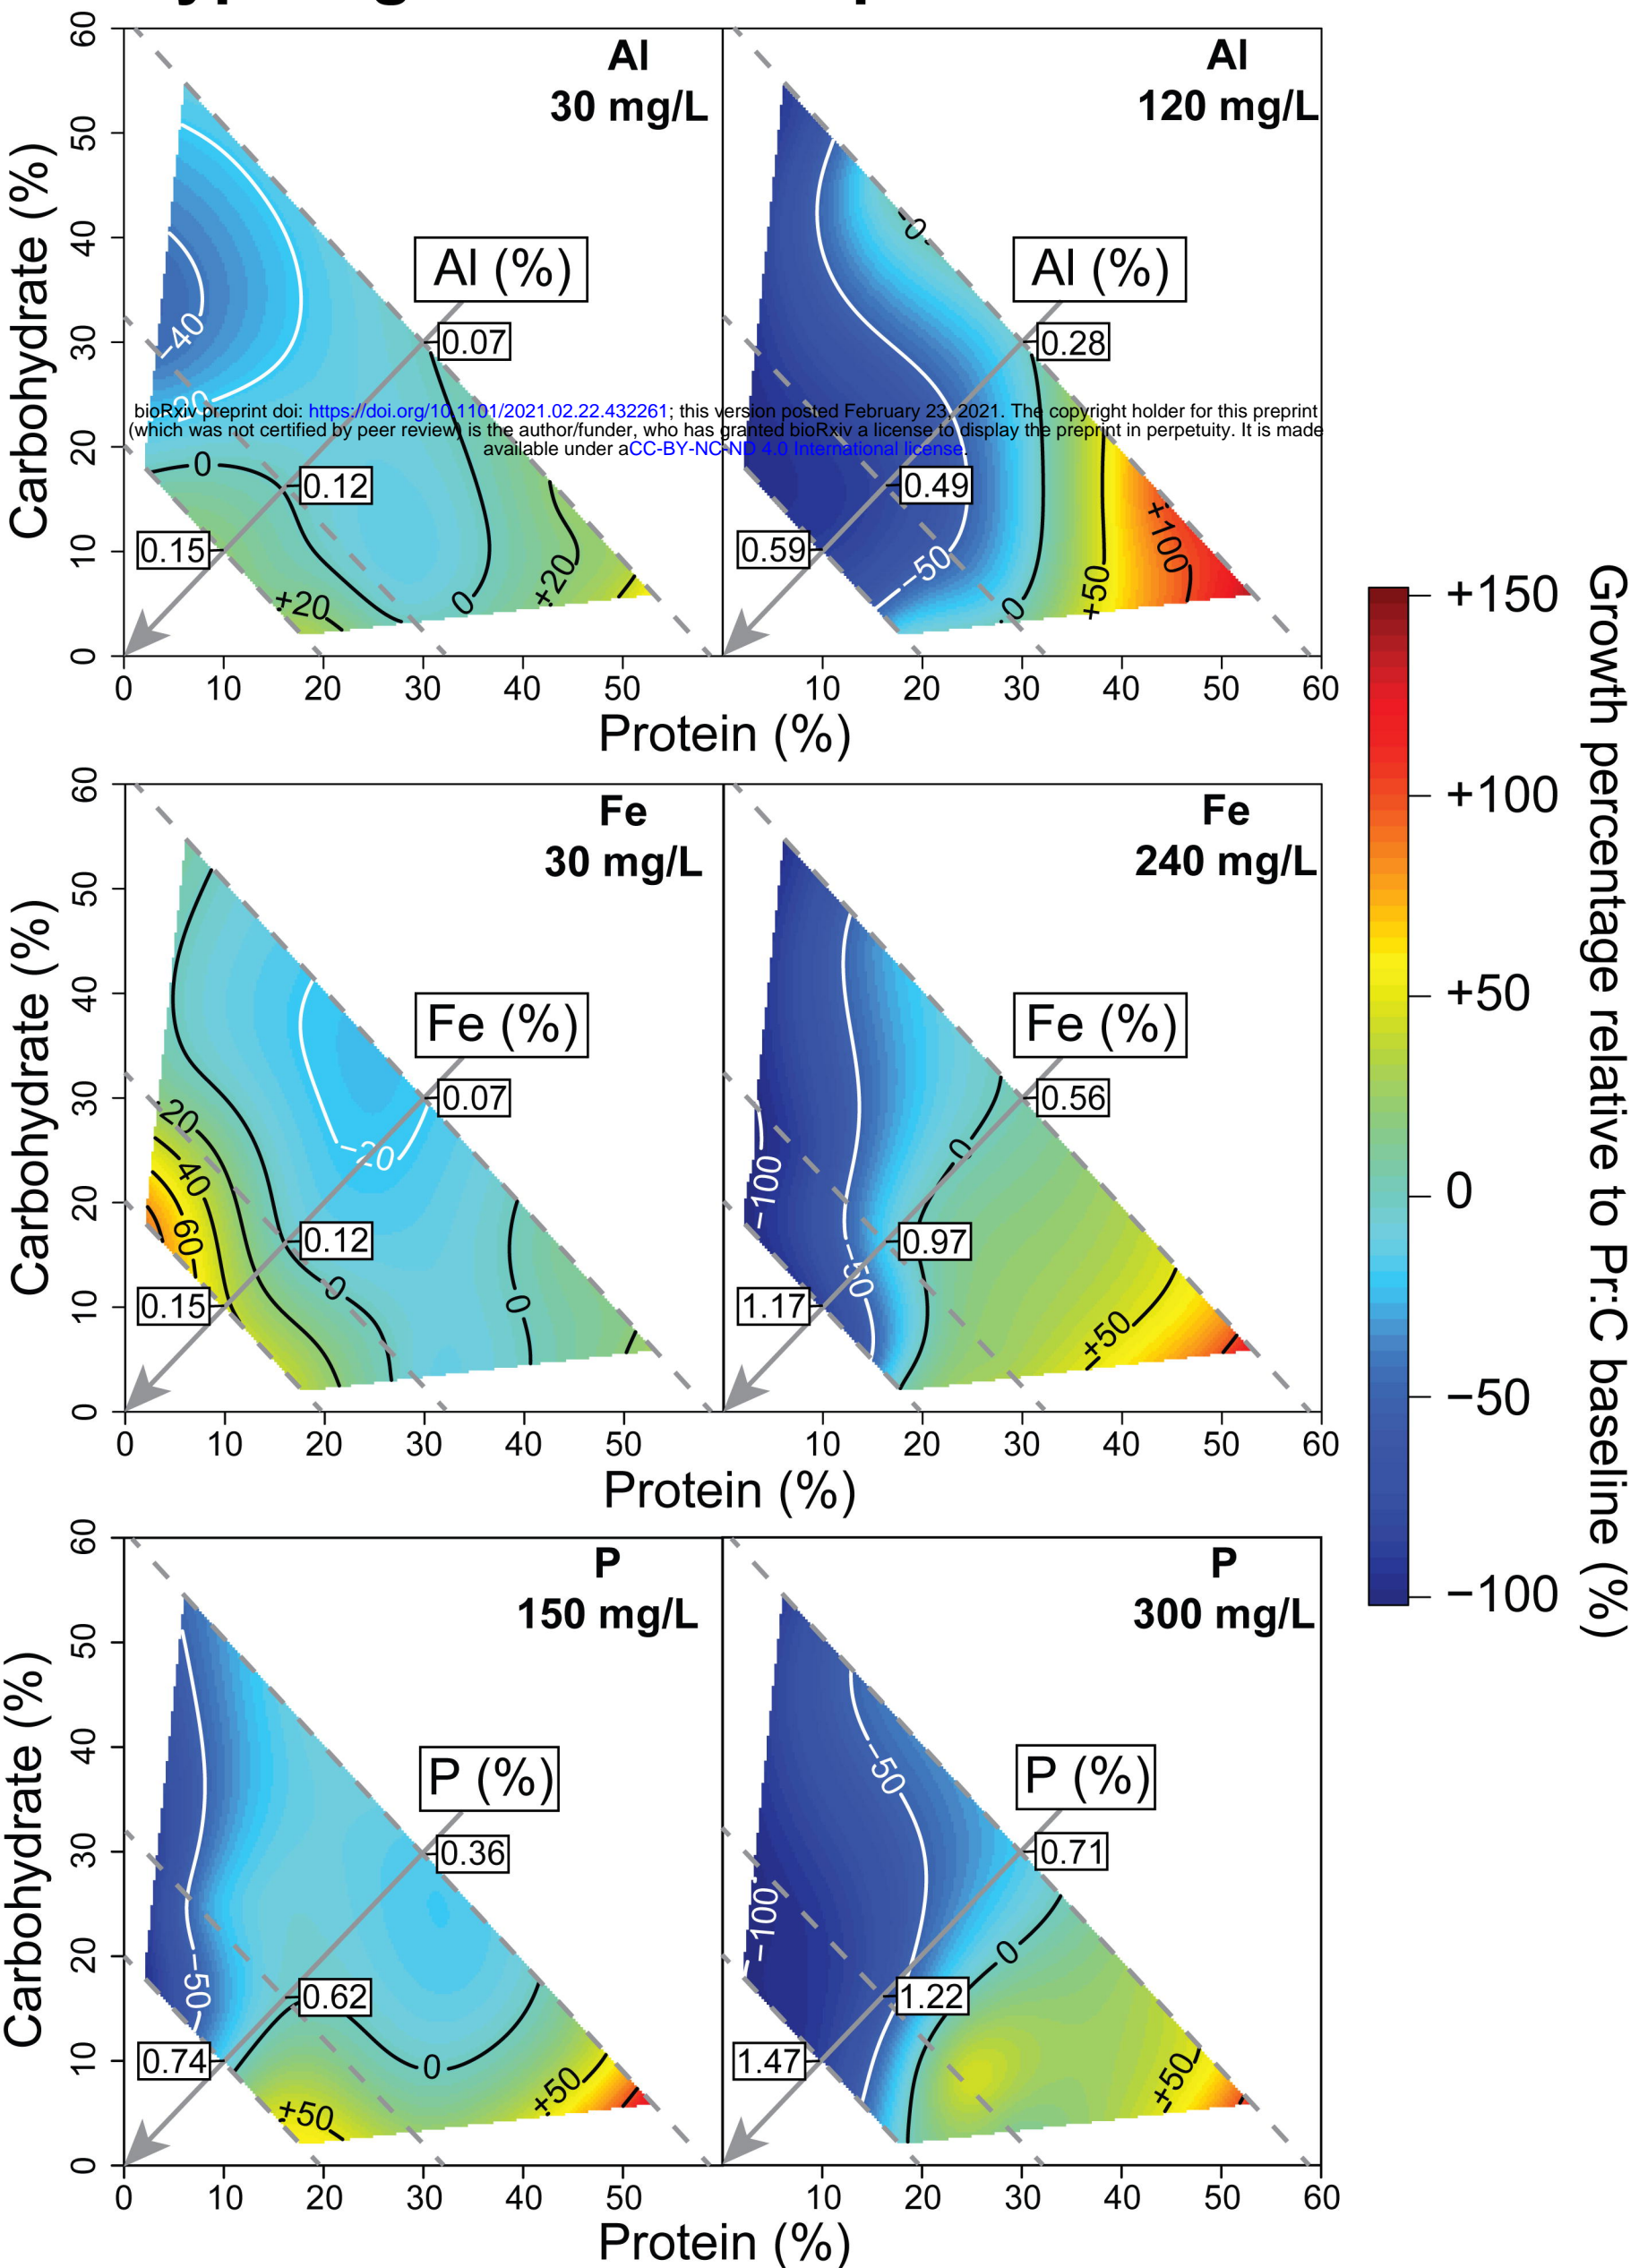

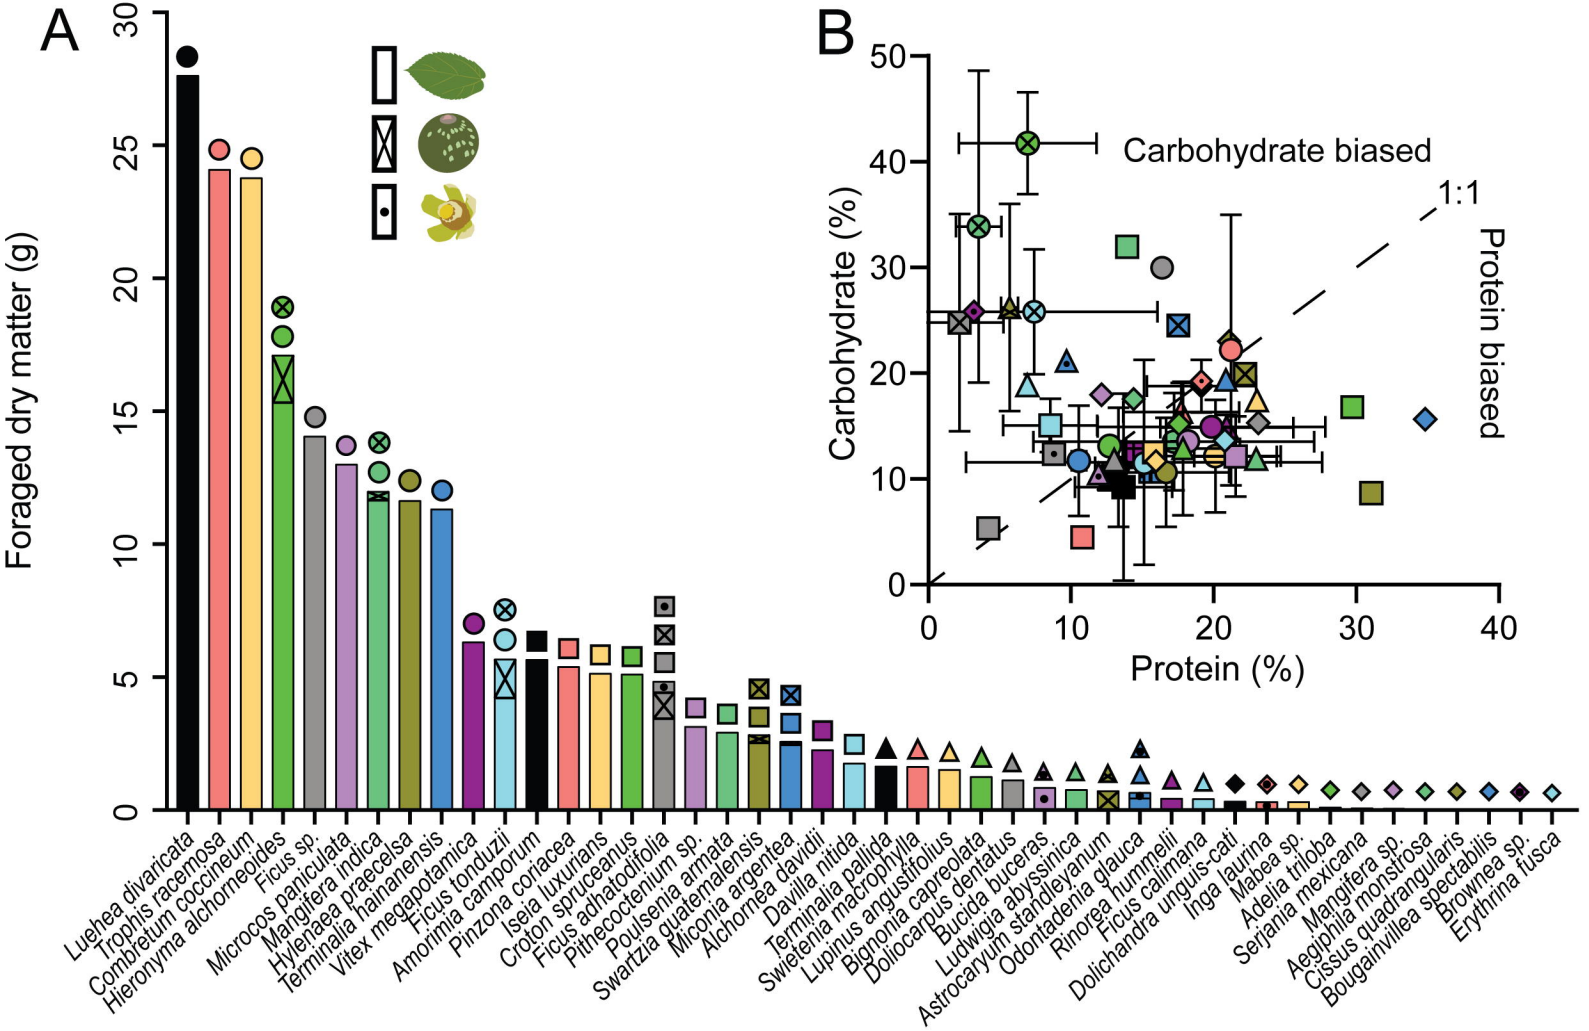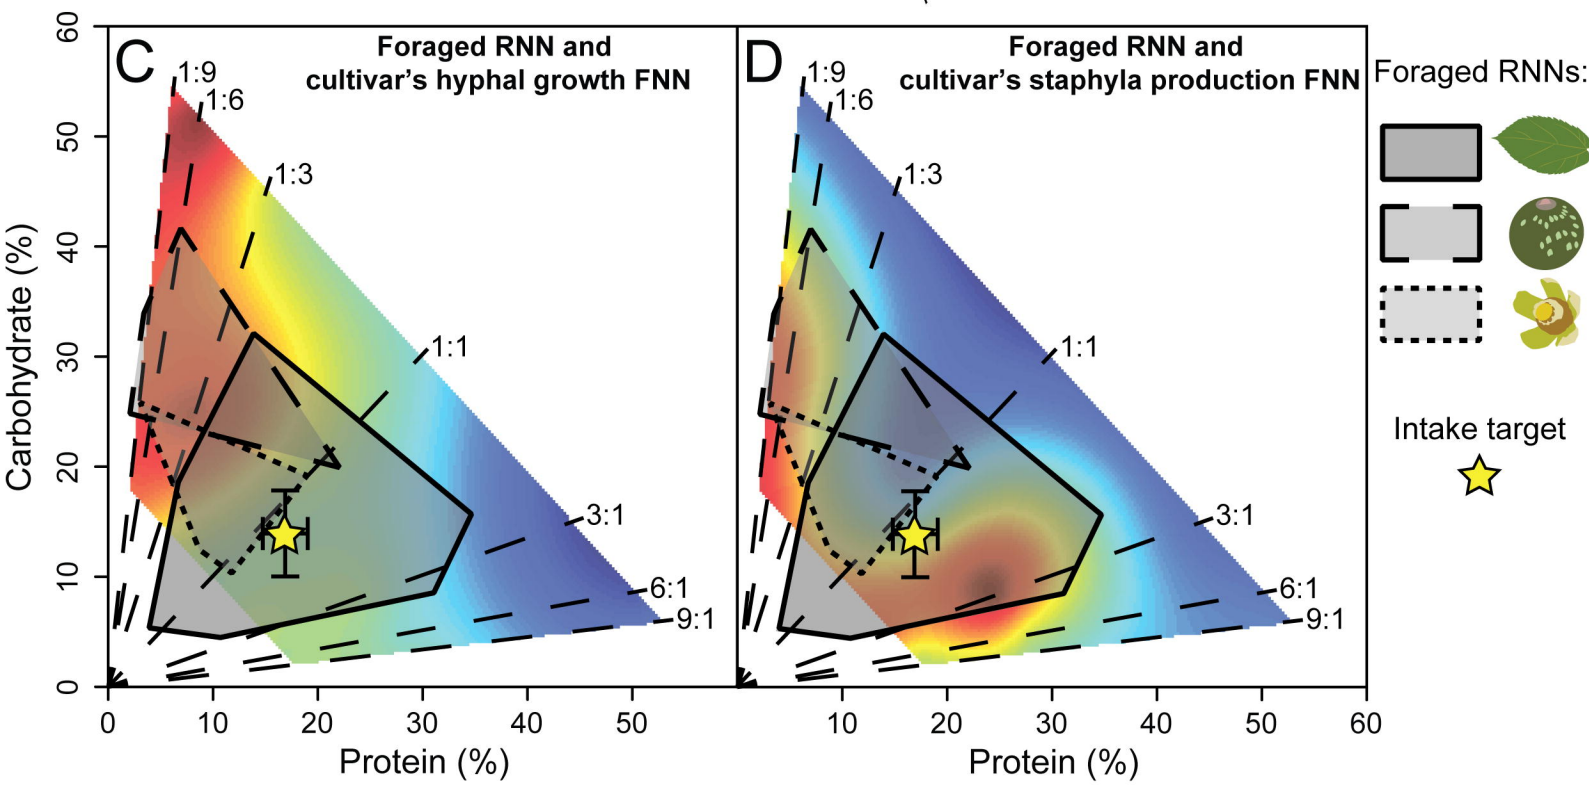

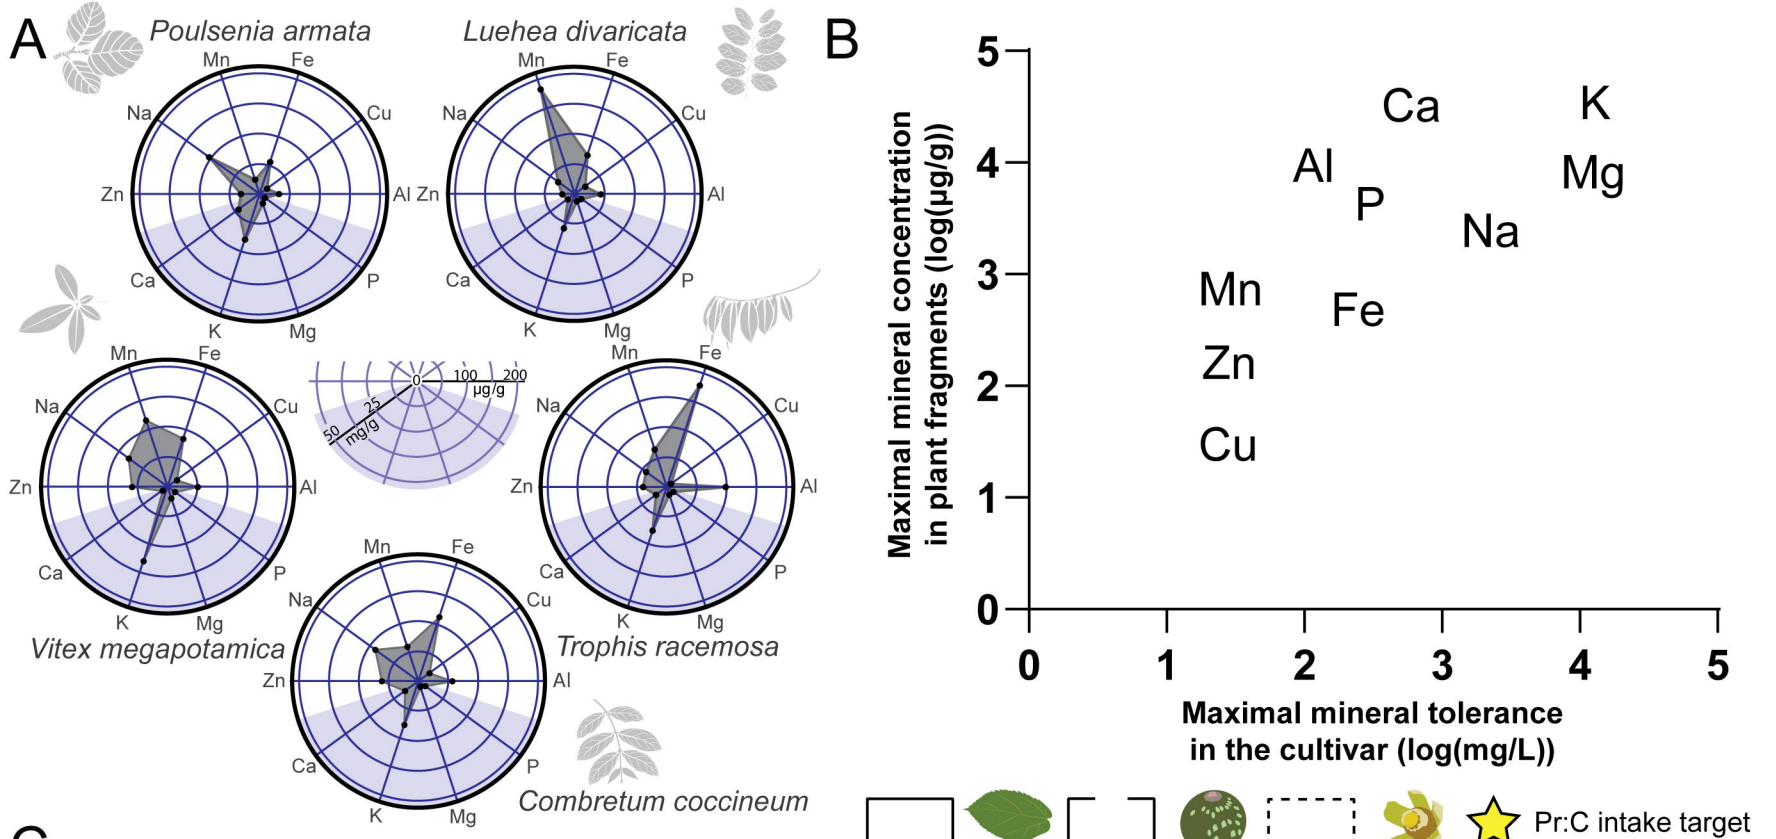

Source: https://biorxiv.org/content/10.1101/2021.02.22.432261v1.full.pdf
